1 Antibiotic Resistance Increases Evolvability and Maximizes Opportunities Across Fitness  
2 Landscapes

3

4 Fabrizio Spagnolo<sup>a,b,1</sup> and Daniel E. Dykhuizen<sup>b</sup>

5

6 <sup>a</sup>Department of Ecology, Evolution, and Environmental Biology, Columbia University

7 <sup>b</sup>Department of Ecology and Evolution, Stony Brook University

8

9

10 Key Words: Antibiotic resistance, compensatory mutation, evolvability, fitness landscape

11

12 <sup>1</sup>To whom correspondence should be addressed. Email: fs2599@columbia.edu

13

14 Abstract

15 Antibiotic resistance continues to grow as a public health problem. One of the reasons for this  
16 continued growth is that resistance to antibiotics is strongly selected for in the presence of  
17 antibiotics and weakly selected against after their removal. This is frequently thought to be due  
18 to the effects of compensatory mutations. However, compensatory mutations are often not  
19 found in clinically relevant strains of antibiotic resistant pathogens. Here, we conduct  
20 experiments *in vitro* that highlight the role that fine scale differences in environment play in the  
21 maintenance of populations after selection for resistance. We show that differences in the  
22 mode of growth, dictated by environmental factors, are capable of reliably changing the force

23 and direction of selection. Our results show that antibiotic resistance can increase evolvability  
24 in environments if conditions for selection exist, selecting differentially for newly arising variation  
25 and moving populations to previously unavailable adaptive peaks.

26

## 27 Significance

28 Antibiotic resistant bacteria are a large and growing problem for public health. A major question  
29 has been why antibiotic resistant strains do not disappear when they must compete with higher  
30 fitness drug sensitive strains. Here we show that selection for antibiotic resistant strains is  
31 particularly sensitive to differences in environmental conditions and that these differences help  
32 to define the fitness landscapes upon which these populations adapt. The result is an increase  
33 in evolvability, with many adaptive peaks that drug resistant populations can explore through  
34 natural selection, making predictions of evolution difficult and selection against resistant strains  
35 improbable.

36

## 37 Introduction

38 One of the most difficult aspects of the antibiotic resistance problem is the contrast  
39 between the speed and strength of selection for antibiotic resistant strains and the slower  
40 selection against antibiotic strains of bacteria. The evolution for antibiotic resistance occurs  
41 either due to de novo mutations or due to horizontal gene transfer events. The concentration of  
42 antibiotics in the environment can either be low enough to allow the sensitive strains to survive  
43 but high enough to select for resistant strains or the concentration of antibiotics in the  
44 environment can be high enough that the drug susceptible phenotypes die off, leaving only  
45 resistant phenotypes to survive, grow, and reproduce. Different mutations are selected in these  
46 two cases (Wistrand-Yuen et al. 2018). In this paper we are studying the latter case, where only

47 the resistant strains survive, because of high levels of antibiotics. Essentially, this is the  
48 strongest way that selection can act: either you are susceptible and quickly die, or you are  
49 resistant and survive. In laboratory experiments, the evolution of a population from susceptible  
50 to resistant has been shown to occur on the scale of hours to days (Spagnolo *et al.*, 2016;  
51 Toprak *et al.*, 2011; Miller *et al.*, 2013).

52 As frequencies of antibiotic resistance rose worldwide, coordinated attempts were  
53 undertaken to reverse resistance by removing the environmental conditions that promoted it in  
54 the first place (Ridley *et al.* 1970). In essence, the strategy was to select against resistance as  
55 quickly and consistently as possible. This was done primarily by lowering rates of antibiotic  
56 usage and relying on the phenomenon known as the “cost of resistance” (Levin *et al.* 1997;  
57 Andersson and Levin 1999; Austin *et al.* 1999), whereby many resistant strains have lower  
58 fitness than the sensitive strains in the absence of antibiotics. Typically, this occurs because a  
59 vital phenotype, such as protein or membrane synthesis, is the target of the antibiotic, and  
60 therefore of the resistance mechanism as well. As such, the phenotype of resistant mutants is  
61 not like wild type, making them less fit in direct competition.

62 Results using this ecological approach have been mixed (Andersson and Hughes 2010),  
63 with reversion away from resistant phenotypes and back to antibiotic sensitivity shown to occur  
64 slowly (Seppala *et al.* 1997), quickly (van den Bogaard *et al.* 2000; Agersø and Aarestrup 2013),  
65 or not at all (Smith 1975; Mölsted *et al.* 2008).

66 Resistant mutations are reliably selected for when antibiotics are used for medical or  
67 agricultural purposes (Bush *et al.* 2011; The Review on Antimicrobial Resistance 2016), but do  
68 not always decline in frequency when the antibiotics are removed from the environment. It has  
69 been proposed that this is due to compensatory mutations (Maisnier-Patin and Andersson  
70 2004). Compensatory mutations relieve the cost of resistance through partial restoration of the  
71 impacted phenotype (Reynolds 2000; Szamecz *et al.* 2014; Hughes and Andersson 2017) and

72 have been consistently found in laboratory experiments (Schrag et al. 1997; Reynolds 2000;  
73 Maisnier-Patin and Andersson 2004). But, compensatory mutations are often absent from  
74 clinical strains of antibiotic resistant bacteria (Andersson and Levin 1999; MacLean and Vogwill  
75 2015), suggesting that something more is at play.

76 In order better understand post-resistance adaptation in bacterial populations, we  
77 conducted several investigations using streptomycin resistant strains of *Escherichia coli* with a  
78 K42N mutation in ribosomal protein S12 under *in vitro* conditions with controlled differences  
79 between them. The results indicate that the adaptive landscape available to a population is of  
80 vital importance to how the population evolves, even when environmental differences seem to  
81 be of extremely fine scale, suggesting that how populations adapt in antibiotic resistance is even  
82 more intricate than previously feared.

83

## 84 Methods

85

### **Strains**

86 All bacterial strains used are *E. coli*, K-12 MG1655 strains. The ancestral strain for all  
87 subsequent experiments is denoted as DD1953 and is known to be free of any plasmids, to be  
88 antibiotic sensitive and to be *rpoS*- due to a premature stop codon in the coding sequence of the  
89 *rpoS* gene. The DD1953 strain served as the streptomycin sensitive ancestral strain for all  
90 experiments. In order to assure genetic homogeneity at the start, DD1953 was grown from a  
91 single *E. coli* colony from an agar plate, grown in liquid media and then frozen for long term use.

92 We used a standard mutant screen to generate streptomycin resistant mutants of  
93 DD1953. The single nucleotide polymorphism (SNP) giving streptomycin resistance was  
94 identified and confirmed by MiSeq as well as Sanger DNA sequencing to be a nonsynonymous  
95 change in the *rpsL* gene at codon 42, changing the wild type leucine to asparagine (K42N). A

96 pure freezer stock was prepared and stored at -80°C. This K42N *rpsL* mutant is the direct  
97 ancestor of all subsequent experimentally evolved populations. This resistant ancestor is  
98 labeled as FS1, or in the case where the mutant is also resistant to T5 bacteriophage, as FS5.

99 Resistance to the bacteriophage T5 was used as a molecular marker in situations where  
100 one was desirable, such as in direct competition experiments. Resistance to T5 is due to a SNP  
101 in the *fhu* gene and has been shown to be selectively neutral in chemostat experiments (Moser  
102 1958). The minimum inhibitory concentrations (MIC) for all strains were found experimentally  
103 using methods identical to those described earlier (Spagnolo et al. 2016). We found that  
104 DD1953 had a MIC for streptomycin of 2-4 µg/mL, with all resistant strains having MICs over  
105 1000 µg/mL.

## 106 Chemostats and Serial Transfer Flasks

107 To inoculate the chemostats and flasks, we grew strains FS1 and FS5 overnight in flasks  
108 inoculated from frozen cultures containing Davis salts and 0.1% glucose at 37°C shaken at 200  
109 rpm. These cultures were diluted the next morning into fresh media and the growth followed by  
110 measuring optical density. When the optical density reached 1.7, we added 1ml of each  
111 inoculating strain to chemostats and flasks containing 30ml of experimental media, which was  
112 Davis salts supplemented with 0.01% glucose (w/v) as the only available carbon source.  
113 Streptomycin concentrations for all experimental evolution vessels were as indicated.

114 All continuous culture experiments were conducted in Kubitschek chemostats following  
115 procedures previously described (Dykhuizen 1993). Here, the generation time was set to 3.69  
116 hours per generation (6.5 gen/day,  $D = 0.1875$ ), matching the mean number of generations per  
117 day in the 1:100 dilution of flask cultures. Additional chemostat related methods are in the  
118 Supplemental Information (**SI**). A total of 4 chemostats were run simultaneously. Chemostats 1  
119 & 2 utilized the Davis minimal media with streptomycin at a concentration of 100 µg/mL (high

120 streptomycin condition). Chemostat 3 had the Davis minimal media and 16  $\mu\text{g}/\text{mL}$  of  
121 streptomycin (low streptomycin condition) as per Miller (Miller 1992). Chemostat 4 had Davis  
122 minimal media but contained no streptomycin (no streptomycin condition). All streptomycin  
123 came from a single prepared stock (10 mg/mL).

124 Two serial transfer flask experiments were run concurrently with the chemostat  
125 experiments. Whereas the chemostats maintained the experimental populations in a constant  
126 state of sub-maximal exponential growth, the serial transfer flask populations underwent full  
127 cycles of lag phase, maximal exponential growth, and stationary phase each day. Two sterile  
128 250 mL flasks were prepared with 30 mLs of fresh Davis minimal media, 0.01% glucose, and  
129 100  $\mu\text{g}/\text{mL}$  of streptomycin (high streptomycin condition). The flasks were placed in an  
130 incubator, maintained at 37°C and constantly shaken at 200 rpm for 24 hours. After a 24 hour  
131 period, 300  $\mu\text{L}$  of the experimental sample was transferred into a fresh 250 mL flask with 30 mL  
132 of fresh media. The 100 fold dilution regime and 24 hour time frame allows for the calculated  
133 number of generations to be 6.5 generations, as per Lenski (Lenski et al. 1991). This  
134 experimental design allows the *average* generation time of the *E. coli* in the flasks to match the  
135 *maintained* generation time in the chemostats.

## 136 **MiSeq**

137 Miseq NG sequencing was performed on population samples. Libraries were prepared  
138 using the Illumina TruSeq genomic DNA-nano and sequenced using Illumina MiSeq 2x300  
139 protocols at the University of Wisconsin Biotechnology Center (Madison, WI). Overall mean  
140 coverage of the genomic sequencing was 162X (SD: 28).

## 141 **Bioinformatics**

142 All bioinformatics was performed in the Galaxy environment. The raw sequence reads  
143 were vetted for quality using FastQC and aligned to the ancestral genome (DD1953) using the

144 reference K-12 MG1655 genome as a scaffold (Genbank accession NC\_000913.3). SNP  
145 calling and indel identification were conducted via the VarCap workflow (Zojer et al. 2017),  
146 which also provides SNP frequency data.

### 147 **Protein Synthesis Assay**

148 Streptomycin acts by binding near the A-site of the ribosome, interfering with the function  
149 of protein S12, the product of the *rpsL* gene. The mechanism of action for streptomycin is  
150 interfering with protein synthesis efficiency, both in rate of protein synthesis and fidelity (Kurland  
151 1992). Structural changes to the S12 protein, particularly at amino acid position 42, are known  
152 to result in high level resistance to streptomycin, but result in reduced protein synthesis efficacy.

153 In order to compare protein synthesis rates for streptomycin sensitive, resistant, and  
154 evolved strains, we performed a protein synthesis assay. S30 cell lysate was extracted from an  
155 exponentially growing population of *E. coli* that was to be assayed. The S30 lysate extraction  
156 protocol was based upon that of Shrestha (Shrestha et al. 2012) with some modification (See  
157 SI). Following S30 lysate extraction, a firefly luciferase assay was performed as per the *E. coli*  
158 S30 Extract System for Circular DNA by Promega guidelines for control experiments using the  
159 Promega pBEST*luc* plasmid for *E. coli* (Promega, Madison, WI). Following 60 minutes of  
160 incubation at 37°C, relative light units (RLU) were measured in triplicate using a Turner  
161 Biosystems (Sunnyvale, CA) Model 20/20n luminometer (See SI).

### 162 **Fitness Assay**

163 In order to compare relative fitness of resistant and evolved strains, direct competitions  
164 between strains were conducted in chemostats in the manner of Dykhuizen (Dykhuizen and  
165 Hartl 1980; Dykhuizen 1993). Using the T5 bacteriophage molecular marker, two strains were  
166 inoculated in a chemostat in equal numbers. Changes in the frequencies of these strains were  
167 tracked over 72-96 hours via plating as described.

168 By plotting the natural log of the ratio of mean CFUs per unit time, the coefficient of  
169 selection was obtained from the slope of the plotted trendline. From these measures, the  
170 relative fitness measure,  $w_R$ , was calculated by use of the equation:

$$w_R = e^s$$

171 All chemostat parameters were as described but the concentration of streptomycin was varied  
172 to coincide with the context of the competition. We note that competition was under chemostat  
173 conditions even for strains evolved in flasks.

#### 174 **Growth Curve Assay**

175 We obtained growth curve data for strains by monitoring optical density ( $\lambda = 600$  nm) in  
176 96-well plates in a SpectraMax Model 384 Plus microplate reader using SoftMaxPro software  
177 (Molecular Devices, Sunnyvale, CA) over a ten hour period. Briefly, we grew strains overnight  
178 in 3 mL of LB (rich media). The next day, 300  $\mu$ L of the overnight growth was added to 9 mL of  
179 Davis minimal media (1:30 dilution). The media-strain mixture was vortexed to insure even  
180 distribution. The inoculated media was then put into replicate wells on the 96 well plate, with  
181 180  $\mu$ LS in each well and at least 1 negative control well per set of technical replicates. A  
182 minimum of 16 replicates were run for each sample.

183 Following inoculation, the 96 well plate was placed into the plate reader and the  
184 populations were allowed to grow. The OD was measured every 60 seconds over a period of  
185 10 hours, with mixing of the plate between reads. Typically, the populations reached stationary  
186 phase well before the 10 hour mark. Data was analyzed using the grofit package (Kahm et al.  
187 2010) and R statistical software (R Development Core Team 2012). The grofit package  
188 determines the time point for transition into exponential growth as well as into stationary phase,  
189 thereby allowing for analysis of length of time spent in lag and exponential growth phases, as  
190 well as the maximum growth rate ( $\mu_{max}$ ), and the density at the transition into stationary phase.



191 The amount of time spent in exponential growth was calculated by finding the difference  
192 between the time point where a well population entered stationary phase and the time point  
193 where exponential phase was entered.

194

## 195 Results

196 Based upon the results of our fitness assays as well as the substantial body of previous  
197 work regarding mechanisms of fitness increases, particularly with regard to streptomycin  
198 resistance, we expected our experimental results would confirm previous work. This  
199 presumption was only partially correct.

### 200 **Loss of Fitness in Streptomycin Resistant Mutants**

201 Amino acid changes at position 42 of the ribosomal protein S12 confer resistance to high  
202 doses of streptomycin. This mutation also confers substantial fitness costs in *Escherichia coli*  
203 (Kurland 1992), *Mycobacterium tuberculosis* (Sander et al. 2002) and *Salmonella enterica*  
204 (Bjorkman et al. 1998). When two *E. coli* strains with spontaneous streptomycin resistant  
205 mutations (both mutations were in codon 42 in the *rpsL* gene) were individually competed  
206 against an isogenic susceptible strain in flask cultures of a modified Davis salts medium with  
207 limited glucose (Schrag and Perrot 1996; Schrag et al. 1997), the selection found was 11 to  
208 19% against the resistant strain.

209 In addition, Paulander *et al.*, using a streptomycin resistant mutation in *Salmonella*  
210 *typhimurium* LT2 [K42N in the S12], measured maximal growth rate in pure culture and then  
211 compared growth rates of the strep-resistant strain to the sensitive strain to determine relative  
212 fitness (Paulander et al. 2009). The sensitive strain grew faster on a rich media (LB) and on M9  
213 minimal media supplemented with glucose or with glycerol, but grew more slowly on poor  
214 media—M9 MM supplemented with pyruvate or with succinate. They showed this was due to

215 the differential induction of the stress-inducible sigma factor, RpoS. On the poor media the  
216 strep-sensitive cells induce *rpoS*, which retards growth. When both cells lack *rpoS*, the effect  
217 disappears. This example shows how the effects of the environment and other physiological  
218 systems in the cell can reverse expectations.

219 We competed streptomycin resistant mutants, FS1 and FS5, (Table 1) in glucose limited  
220 chemostats. These mutations were in the codon 42 of the S12 ribosomal protein like the above  
221 example. Strains FS1 and FS5 had lower relative fitness when compared to the streptomycin  
222 sensitive ancestor, DD1953. The fitness of FS1 (T5 bacteriophage susceptible) and FS5 (T5  
223 bacteriophage resistant) was measured to be  $0.91 \pm \text{SD } 0.02$  relative to DD1953 (mean of three  
224 samples) in our fitness assay (Table 3). This level of fitness loss is in line with that found in  
225 previous experiments (Schrag and Perrot 1996; Björkman et al. 2000).

#### 226 **Fitness Increases via Compensatory Mutations in Batch Culture**

227 As in previous experiments with streptomycin resistant bacteria in batch culture, the  
228 streptomycin resistant mutants rapidly selected for compensatory mutations in the *rpsD* and  
229 *rpsE* genes (S4 and S5 small ribosomal proteins, respectively) (Table 2) and increased in  
230 fitness relative to the ancestor (2-4%). The compensatory mutations did not affect MICs of our  
231 strep-resistant strains.

232 Ribosomal ambiguity mutations (*ram*) in *rpsD* and *rpsE* have been shown to be  
233 compensatory (Maisnier-Patin et al. 2002) for hyperaccurate *rpsL* mutants, such as ours. This  
234 is believed to be because of *ram* mutants' pleiotropic effect of increasing polypeptide synthesis  
235 rates, thereby counterbalancing the increased synthesis time caused by slowed proofreading in  
236 hyperaccurate mutants of *rpsL* (Bohman et al. 1984) (See Poehlsgaard and Douthwaite 2005;  
237 Holberger and Hayes 2009 for reviews). These *ram* mutations do not increase polypeptide

238 synthesis when the genetic background includes a wild type *rpsL* gene, as measured *in vitro*  
239 using radioactive isotope tagged amino acids (Andersson et al. 1982).

240         There can be two approaches to testing the overall fitness effects of these compensatory  
241 mutations. The first was taken by Schrag and Perrot where they used P1 to transduce both the  
242 streptomycin sensitive and the streptomycin resistant alleles into the evolved cultures carrying  
243 the streptomycin resistant mutation (Schrag and Perrot 1996). Their results were quite variable  
244 but in all cases the strain carrying the resistant allele had an advantage over the strain carrying  
245 the sensitive allele in flask cultures. They found compensatory mutations in *rpsD* and *rpsE*  
246 which were selected in conjunction with a change at position 42 in the S12 ribosomal protein,  
247 but were detrimental when paired with the streptomycin sensitive allele. These compensatory  
248 mutations led to a condition where reversion to sensitivity would be selected against; genetic  
249 background matters in determining the fitness of the strain carrying a mutation giving resistance  
250 to streptomycin.

251         We took the second approach. The evolved strains carrying the mutation giving  
252 streptomycin resistance were competed against unevolved strains carrying the streptomycin  
253 resistance allele. The evolved strains had all been evolved either in flask culture or in  
254 chemostats (Table 1). Overall, evolved strains increased fitness relative to their streptomycin  
255 resistant ancestors 2-4% above where they started in the experiments (Table 3).

#### 256         **No Previously Identified Compensatory Mutations in Chemostats**

257         In our chemostat experiments, the growth medium was identical to that of the flask  
258 experiments, although the growth conditions clearly were not. We also varied the concentration  
259 of streptomycin in different chemostats to test for effect. Fitnesses also increased in these  
260 evolved strains, but the genetic mechanism was different. In chemostat cultures, we found no  
261 compensatory mutations in *rpsL*, *rpsE*, or *rpsD* (Table 2), all of which have previously been

262 associated with changes in *rpsL*. By performing whole-genome sequencing of evolved clones,  
263 we identified changes in the glucose uptake systems of the chemostat evolved strains,  
264 particularly in *galS*, which have previously been found in chemostat evolved strains of strep-  
265 sensitive *E. coli* (Notley-McRobb and Ferenci 1999). Thus, the changes were not compensatory.

## 266 **Unexpected Phenotypic Changes**

267 We performed growth curve assays in order to better understand the nature of the  
268 observed fitness increases. The expectation was that we would observe increases in maximum  
269 growth rates in the flask-evolved strains as a result of the compensatory mutations increasing  
270 protein synthesis efficiency. However, even prior to the experimental evolution experiments,  
271 maximum growth rates did not differ between strep-sensitive DD1953 and the resistant clones  
272 FS1 and FS5 in minimal glucose media. In the evolved strains, we were surprised to find no  
273 discernible pattern of increase in maximal growth rates, regardless of whether strains evolved in  
274 flasks or chemostats (Fig 1B). We note that the low maximum growth rate of strain 4C2-12R,  
275 which could be because of some unknown mutational or regulatory change, seems to be  
276 reflected in longer time in exponential growth. This could be a unique phenomenon for which  
277 we have no explanation. Additionally, there was no observable pattern to changes in time spent  
278 in lag phase or the population density at entry to stationary phase for evolved strains when  
279 compared to the strep resistant ancestors (Fig 1A&C).

280 We did, however, find strong support for directional selection on the amount of time  
281 spent in exponential growth for all evolved strains. This increase in the time spent in  
282 exponential growth is consistent across all strains regardless of *in vitro* method, the  
283 concentration of streptomycin present, or the type or number of mutations found in the evolved  
284 populations. Our results indicate that regardless of experimental condition, selection  
285 consistently acts upon the time in exponential growth. FS1 and FS5, the unevolved strains  
286 containing new mutations giving rise to streptomycin resistance, have a normal growth rate but

287 a shortened time in exponential growth. In the evolved strains derived from these two strains the  
288 time in exponential growth is like the original strain, DD1953, as if selection acts upon this  
289 phenotype.

290 In order to better understand these results, a functional protein synthesis assay was  
291 conducted. This assay also yielded unexpected results. Rather than indicating an increase in  
292 the speed and/or accuracy in producing functional proteins (particularly after compensatory  
293 mutations), the rate of synthesis of functional proteins for all evolved strains was *lower* than the  
294 streptomycin resistant ancestors in the presence of streptomycin (Fig 3). This indicates that the  
295 rate of protein synthesis, long thought to be the phenotype most effected by streptomycin  
296 resistance, may not tell the entire story of streptomycin-resistance adaptation in bacteria. As a  
297 control, we also performed the protein synthesis assay under strep free conditions. Under these  
298 conditions, DD1953, the strep-sensitive ancestor, produced functional protein at a rate 2,372X  
299 higher than when in the presence of streptomycin (Fig S1). For evolved strains, most showed  
300 little or no significant difference to results with streptomycin present. Two of three flask evolved  
301 strains had increases in functional protein synthesis when streptomycin was absent, but this is  
302 an environmental condition in which they did not evolve and the rate of protein synthesis was  
303 still approximately two orders of magnitude lower than in wild type. Additional data for the  
304 protein synthesis assays is in the Supplemental Information.

305

## 306 Discussion

307 Based upon previously published work, many of our results were precisely as expected  
308 for an experimental evolution study investigating adaptation post-resistance. We observed the  
309 cost of resistance typical of streptomycin resistance in *E. coli* with subsequent increases in  
310 relative fitness. In flasks, these fitness increases came via compensatory evolution at known

311 loci. In chemostat evolved strains, fitness increased through changes in glucose uptake  
312 systems, which has been previously observed for *E. coli* evolved under glucose limited  
313 conditions, although not in relation to streptomycin adaptation. However, when we sought to  
314 investigate the mechanisms underlying these fitness increases, we found novel results  
315 suggesting that the ways in which antibiotic resistant strains adapt post-resistance is more  
316 complex than what is expected. We attempt to dissect our results and provide some potential  
317 context here.

318         General changes in fitness were anticipated: fitness relative to the antibiotic resistant  
319 ancestor (FS1, FS5) increased across all experimental populations. We found a strong signal  
320 for directional selection for increased time spent in exponential growth in all evolved populations  
321 even though the mechanism of this selection differs depending upon the environmental  
322 conditions experienced during the evolution experiment. This phenotype is one we do not  
323 believe has been highlighted before, but may play a large role in how bacterial populations  
324 grow, particularly if they are also antibiotic resistant. The environmental differences between  
325 conditions may seem minor, given that they were identical except for the *in vitro* method used  
326 and the streptomycin concentration (for chemostats), but even at this extremely fine scale,  
327 environment made all the difference.

328         In chemostats, the genotypic changes centered on glucose uptake involving the *ga/S*  
329 system. Similar changes have been observed previously in *E. coli* growing under glucose limited  
330 conditions in chemostats (Notley-McRobb and Ferenci 1999), however, in that case the strain of  
331 *E. coli* used, BW2952 (Genbank Accession CP001396), was not resistant to streptomycin. This  
332 tells us that such glucose uptake changes mean that this evolutionary path is accessible via  
333 selection without regard to antibiotic resistance phenotypes and was a result of the glucose  
334 limited environment.

335 In flasks, however, the mechanism was completely different. Genetic changes in serial  
336 transfer populations centered on additional changes to the strep-resistant ribosome. Similar  
337 compensatory mutations have been previously reported for streptomycin resistant strains of  
338 both *E. coli* (Schrag and Perrot 1996; Schrag et al. 1997) and *Salmonella Typhimurium*  
339 (Björkman et al. 1999, 2000). In the previous cases, these compensatory mutations have been  
340 shown to increase rates of polypeptide chain synthesis in the ribosome (Andersson et al. 1982),  
341 which is the phenotype most notably affected by the molecular mechanism of streptomycin  
342 resistance in those ribosomes. The speed of protein synthesis is integral to bacterial growth,  
343 and therefore fitness, in flasks and bacteria are expected to select for increases in maximum  
344 growth rate ( $\mu_{\max}$ ) under these conditions (Lenski 2017). Compensatory mutations in strep-  
345 resistant strains is thought to aid in increasing  $\mu_{\max}$ .

346 However, when we directly measure  $\mu_{\max}$  in our flask evolved strains, the data do not  
347 support this hypothesis. FS1 and FS5 do not have lower  $\mu_{\max}$  values than the streptomycin  
348 sensitive ancestor, DD1953, even though they have a mutation in the *rpsL* gene known to  
349 impact protein synthesis. Additionally, flask evolved strains do not show increases in  $\mu_{\max}$   
350 values, even though these populations have previously identified compensatory mutations  
351 (Table 2). In fact, there is no pattern of increase in  $\mu_{\max}$  for any of our experimentally evolved  
352 strains (Figure 1B). The lack of change in  $\mu_{\max}$  values is also supported by our functional  
353 protein synthesis assay, which unexpectedly found *lower* rates of production of functional  
354 protein in evolved strains than in the streptomycin resistant ancestor for all strains evolved in the  
355 presence of streptomycin (Figures 2, S1). In fact, the only evolved strain that did not have a  
356 significantly lower rate of protein synthesis was 4C4-10S, which was evolved without  
357 streptomycin *in a chemostat*.

358 Across all of our evolved strains, the only pattern of selection was for increases in the  
359 amount of time spent in exponential growth (Figure 1D). This signal was robust to all

360 experimental conditions and concentrations of streptomycin. At the endpoints of the  
361 experiments, the time spent in exponential growth for evolved strains was similar to that for  
362 DD1953, suggesting that this phenotype has a large impact on relative fitness, a conclusion  
363 supported by our fitness assays.

364 In order to understand our results in context, we believe it is necessary to consider both  
365 the evolvability as well as the fitness landscapes of our strains in the environments tested. In  
366 chemostats, the genetic changes (*ga/S*) were predictable based upon the experimental  
367 conditions, even if the phenotypic changes (time in exponential growth) were not. Genotypic  
368 changes did not depend on the antibiotic resistance state of the genetic background and  
369 reflected adaptation to the limiting nutrient in a chemostat (Warsi and Dykhuizen 2017). In  
370 flasks, the selection was for genotypic changes that were not accessible via natural selection  
371 prior to streptomycin resistance. These mutations were, however, open to selection *after* the  
372 switch to a streptomycin laden environment, suggesting that the antibiotic resistance mutation  
373 not only allowed for the strain to survive in the new environment, but it also increased the  
374 evolvability of the strain in this new environment by opening up adaptive paths that did not exist  
375 beforehand. In doing so, post-resistance adaptation potential (i.e., the number of possible  
376 adaptive paths accessible by selection) increased. This makes the success of any anti-  
377 selection regime, such as those often relied upon in order to control the spread of resistance,  
378 highly improbable.

379 Considered in a different way, we understand that the addition of antibiotic changes the  
380 environment substantially, which also changes the adaptive landscape from the perspective of  
381 the bacteria. Strains that were high fitness in the strep-free environment cannot survive after  
382 the addition of streptomycin. This may be most evident in a genotype to fitness map, where we  
383 understand that the antibiotic sensitive ancestor, DD1953, was high fitness in the absence of  
384 streptomycin. However, the DD1953 strain has an effective fitness of 0 once streptomycin is



385 added to the environment. In strep-laden environments, FS1 and FS5, which are lower fitness  
386 in the antibiotic free environment, assume higher fitness. The environmental change further  
387 reveals hidden genetic variation (Szamecz et al. 2014), offering FS1 and FS5 access to higher  
388 fitness optima via selection. Our data show that these fitness peaks are related to the time  
389 spent in exponential growth phenotype. Importantly, our results indicate that *how* strains access  
390 these peaks differs based upon their specific *in vitro* environments, with chemostats having an  
391 adaptive path similar to that available to strep-sensitive populations and batch cultures having  
392 an adaptive path contingent upon the strep-resistance mechanism, which was not available to  
393 strep-sensitive strains. In this way, phenotype and environment conspired to increase  
394 evolvability in our streptomycin resistant strains.

395         The increase in the number of possible adaptive paths for antibiotic resistant strains may  
396 provide a hypothesis to explain why selection against antibiotic resistance has proven so  
397 difficult. Populations at global optima, such as antibiotic sensitive strains, are likely to have  
398 inherent phenotypic compromises. For a large population with sizeable genetic diversity,  
399 environmentally mediated release from a global optimum can be expected to allow for  
400 directional selection for any variety of previously inaccessible phenotypes. Such a shift and  
401 change in accessibility may reflect an increase in evolvability. Antibiotic resistance represents a  
402 specialized case of such an environmentally mediated release whereby the effect upon  
403 selection is particularly strong, with high fitness genotypes suddenly becoming lethal.

404         If evolvability does increase post-resistance, antibiotic rich environments may act as a  
405 mechanism that releases populations from the generalized fitness peaks upon which they had  
406 been stranded and may further provide additional paths with which they could then explore a  
407 newly enriched fitness landscape. The increased availability of high fitness peaks, particularly  
408 in new environments, illustrates what we have come to think of as a rabbit hole effect, whereby  
409 previously unavailable genotype/fitness combinations become available through a sudden

410 change in the environment. Much like Alice after tumbling to the bottom of the rabbit hole, there  
411 are new worlds suddenly available for exploration. In this study, the higher fitness flask evolved  
412 strains reached their fitness peaks by increasing the time spent in exponential growth relative to  
413 their direct strep-resistant ancestors through additional changes to a mutated ribosome. These  
414 changes were not genetically possible through selection without the sequence of resistance  
415 mutation, streptomycin positive environment, and then adaptation in batch culture. When the  
416 identical sequence is repeated in continuous culture, such genotypic changes are not observed,  
417 suggesting such a path is less likely, if not altogether impossible.

418           In 1975, H.W. Smith warned against the idea of combating established antibiotic  
419 resistance by expecting resistant strains to select for susceptibility simply by removing the  
420 antibiotic from the environment (Smith 1975). This ecological fallacy still remains and we have  
421 learned by some tough lessons that reversing resistance will not be quite as simple as hoped  
422 (Andersson and Hughes 2010). Recently, however, new approaches have begun to show  
423 promise in reversing resistance, such as in some phage treatments for drug resistant bacterial  
424 populations (Chan et al. 2016). This study suggests that undoing what has been done may be  
425 even more complicated yet: ephemeral switches in environments may increase the adaptive  
426 potential of resistant populations and allow for increases in fitness that cannot be predicted *a*  
427 *priori*.

428

#### 429 Acknowledgements

430 This work was supported by Lawrence B. Slobodkin and George C. Williams Fellowships (FS)  
431 and the Columbia Frontiers of Science Fellowship (FS). The authors thank Walt Eanes, John  
432 True, Peter Tonge, and Omar Warsi for helpful discussions. This is contribution number 1,247  
433 from the Ecology and Evolution Department of Stony Brook University.

434

435 References

- 436 Agersø, Y., and F. M. Aarestrup. 2013. Voluntary ban on cephalosporin use in Danish pig  
437 production has effectively reduced extended-spectrum cephalosporinase-producing *Escherichia*  
438 *coli* in slaughter pigs. *The Journal of Antimicrobial Chemotherapy* 68:569–572.
- 439 Andersson, D. I., K. Bohman, L. A. Isaksson, and C. G. Kurland. 1982. Translation rates and  
440 misreading characteristics of *rpsD* mutants in *Escherichia coli*. *Molecular & General Genetics*  
441 187:467–472.
- 442 Andersson, D. I., and D. Hughes. 2010. Antibiotic resistance and its cost: is it possible to  
443 reverse resistance? *Nature reviews. Microbiology* 8:260–71.
- 444 Andersson, D. I., and B. R. Levin. 1999. The biological cost of antibiotic resistance. *Current*  
445 *opinion in microbiology* 2:489–93.
- 446 Austin, D. J., K. G. Kristinsson, and R. M. Anderson. 1999. The relationship between the volume  
447 of antimicrobial consumption in human communities and the frequency of resistance.  
448 *Proceedings of the National Academy of Sciences of the United States of America* 96:1152–  
449 1156.
- 450 Bjorkman, J., D. Hughes, and D. I. Andersson. 1998. Virulence of antibiotic-resistant *Salmonella*  
451 *typhimurium*. *Proceedings of the National Academy of Sciences* 95:3949–3953.
- 452 Björkman, J., I. Nagaev, O. G. Berg, D. Hughes, and D. I. Andersson. 2000. Effects of  
453 Environment on Compensatory Mutations to Ameliorate Costs of Antibiotic Resistance. *Science*  
454 287:1479–1482.
- 455 Björkman, J., P. Samuelsson, D. I. Andersson, and D. Hughes. 1999. Novel ribosomal  
456 mutations affecting translational accuracy, antibiotic resistance and virulence of *Salmonella*  
457 *typhimurium*. *Molecular microbiology* 31:53–8.

- 458 Bohman, K. T., T. Ruusala, P. C. Jelenc, and C. G. Kurland. 1984. Kinetic Impairment of  
459 Restrictive Streptomycin-Resistant Ribosomes. *Molecular & General Genetics* 198:90–99.
- 460 Bush, K., P. Courvalin, G. Dantas, J. Davies, B. Eisenstein, P. Huovinen, G. A. Jacoby, et al.  
461 2011. Tackling antibiotic resistance. *Nature reviews. Microbiology* 9:894–896.
- 462 Chan, B. K., M. Sistrom, J. E. Wertz, K. E. Kortright, D. Narayan, and P. E. Turner. 2016. Phage  
463 selection restores antibiotic sensitivity in MDR *Pseudomonas aeruginosa*. *Scientific Reports*  
464 6:1–9.
- 465 Dykhuizen, D. E. 1993. Chemostats Used for Studying Natural Selection and Adaptive  
466 Evolution. *Methods in Enzymology* 224:613–631.
- 467 Dykhuizen, D., and D. L. Hartl. 1980. Selective neutrality of 6PGD allozymes in *E. coli* and the  
468 effects of genetic background. *Genetics* 96:801.
- 469 Holberger, L. E., and C. S. Hayes. 2009. Ribosomal protein S12 and aminoglycoside antibiotics  
470 modulate A-site mRNA cleavage and transfer-messenger RNA activity in *Escherichia coli*. *The*  
471 *Journal of biological chemistry* 284:32188–200.
- 472 Hughes, D., and D. I. Andersson. 2017. Evolutionary Trajectories to Antibiotic Resistance.  
473 *Annual Review of Microbiology* 71:579–596.
- 474 Kahm, M., G. Hasenbrink, H. Lichtenberg-Frate, J. Ludwig, and M. Kschischo. 2010. grofit:   
475 Fitting Biological Growth Curves with R. *Journal of Statistical Software* 33.
- 476 Kurland, C. G. 1992. Translational accuracy and the fitness of bacteria. *Annual review of*  
477 *genetics* 26:29–50.
- 478 Lenski, R. E. 2017. Experimental evolution and the dynamics of adaptation and genome  
479 evolution in microbial populations. *The ISME Journal* 11:2181–2194.

- 480 Lenski, R. E., M. R. Rose, S. C. Simpson, and S. C. Tadler. 1991. Long-term experimental  
481 evolution in *Escherichia coli*. I. Adaptation and divergence during 2,000 generations. *American*  
482 *Naturalist* 1315–1341.
- 483 Levin, B. R., M. Lipsitch, V. Perrot, S. Schrag, R. Antia, L. Simonsen, N. M. Walker, et al. 1997.  
484 The population genetics of antibiotic resistance. *Clinical Infectious Diseases* 24:S9–S16.
- 485 MacLean, R. C., and T. Vogwill. 2015. Limits to compensatory adaptation and the persistence of  
486 antibiotic resistance in pathogenic bacteria. *Evolution, Medicine, and Public Health* 2015:4–12.
- 487 Maisnier-Patin, S., and D. I. Andersson. 2004. Adaptation to the deleterious effects of  
488 antimicrobial drug resistance mutations by compensatory evolution. *Research in Microbiology*  
489 155:360–369.
- 490 Maisnier-Patin, S., O. G. Berg, L. Liljas, and D. I. Andersson. 2002. Compensatory adaptation to  
491 the deleterious effect of antibiotic resistance in *Salmonella typhimurium*. *Molecular microbiology*  
492 46:355–66.
- 493 Miller, C., J. Kong, T. T. Tran, C. A. Arias, G. Saxer, and Y. Shamoo. 2013. Adaptation of  
494 *Enterococcus faecalis* to daptomycin reveals an ordered progression to resistance.  
495 *Antimicrobial agents and chemotherapy* 57:5373–83.
- 496 Miller, J. H. 1992. *A Short Course in Bacterial Genetics: A Laboratory Manual and Handbook for*  
497 *Escherichia coli and Related Bacteria* (1st ed.). Cold Spring Harbor Laboratory Press,  
498 Plainview, NY.
- 499 Mölsted, S., M. Erntell, H. Hanberger, E. Melander, C. Norman, G. Skoog, C. S. Lundborg, et al.  
500 2008. Sustained reduction of antibiotic use and low bacterial resistance: 10-year follow-up of  
501 the Swedish Strama programme Sustained reduction of antibiotic use and low bacterial  
502 resistance: *Lancet Infectious Diseases* 8:125–132.

- 503 Moser, H. 1958. The Dynamics of Bacterial Populations Maintained in the Chemostat. Carnegie  
504 Institute publ. no. 614. Carnegie Institution for Science, Washington DC.
- 505 Notley-McRobb, L., and T. Ferenci. 1999. Adaptive *mgl*-regulatory mutations and genetic  
506 diversity evolving in glucose-limited *Escherichia coli* populations. *Environmental Microbiology*  
507 1:33–43.
- 508 Paulander, W., S. Maisnier-Patin, and D. I. Andersson. 2009. The fitness cost of streptomycin  
509 resistance depends on *rpsL* mutation, carbon source and *RpoS* (*sigmaS*). *Genetics* 183:539–  
510 46, 1S1-2S1.
- 511 Poehlsgaard, J., and S. Douthwaite. 2005. The bacterial ribosome as a target for antibiotics.  
512 *Nature reviews. Microbiology* 3:870–81.
- 513 R Development Core Team. 2012. R: A Language and Environment for Statistical Computing. R  
514 Foundation for Statistical Computing Vienna Austria. Foundation for Statistical Computing,  
515 Vienna, Austria.
- 516 Reynolds, M. G. 2000. Compensatory evolution in rifampin-resistant *Escherichia coli*. *Genetics*  
517 156:1471–1481.
- 518 Ridley, M., R. Lynn, D. Barrie, and K. C. Stead. 1970. Antibiotic-Resistant *Staphylococcus*  
519 *aureus* and Hospital Antibiotic Policies. *The Lancet* 295:230–233.
- 520 Sander, P., B. Springer, T. Prammananan, A. Sturfels, M. Kappler, M. Pletschette, and E. C.  
521 Böttger. 2002. Fitness cost of chromosomal drug resistance-conferring mutations. *Antimicrobial*  
522 *Agents and Chemotherapy* 46:1204–1211.
- 523 Schrag, S. J., and V. Perrot. 1996. Reducing antibiotic resistance. *Nature* 381:120–121.
- 524 Schrag, S. J., V. Perrot, and B. R. Levin. 1997. Adaptation to the fitness costs of antibiotic  
525 resistance in *Escherichia coli*. *Proceedings. Biological sciences / The Royal Society* 264:1287–

- 526 1291.
- 527 Seppala, H., T. Klaukka, J. Vuopio-Varkila, A. Muotiala, H. Helenius, K. Lager, P. Huovinen, et  
528 al. 1997. The Effect of Changes in the Consumption of Macrolide Antibiotics on Erythromycin  
529 Resistance in Group A Streptococci in Finland. *The New England Journal of Medicine* 337:441–  
530 446.
- 531 Shrestha, P., T. M. Holland, and B. C. Bundy. 2012. Streamlined extract preparation for  
532 *Escherichia coli*-based cell-free protein synthesis by sonication or bead vortex mixing.  
533 *BioTechniques* 53:163–174.
- 534 Smith, H. W. 1975. Persistence of Tetracycline Resistance in Pig *E. coli*. *Nature* 258:628–630.
- 535 Spagnolo, F., C. Rinaldi, D. R. Sajorda, and D. E. Dykhuizen. 2016. The Evolution of  
536 Resistance to Continuously Increasing Streptomycin Concentrations in Populations of *E. coli*.  
537 *Antimicrobial Agents and Chemotherapy* 60:1336–1342.
- 538 Szamecz, B., G. Boross, D. Kalapis, K. Kovács, G. Fekete, Z. Farkas, V. Lázár, et al. 2014. The  
539 Genomic Landscape of Compensatory Evolution. *PLoS biology* 12:e1001935.
- 540 The Review on Antimicrobial Resistance. 2016. *Tackling Drug-Resistant Infections Globally:  
541 Final Report and Recommendations*. London, United Kingdom.
- 542 Toprak, E., A. Veres, J.-B. Michel, R. Chait, D. L. Hartl, and R. Kishony. 2011. Evolutionary  
543 paths to antibiotic resistance under dynamically sustained drug selection. *Nature Genetics*  
544 44:101–105.
- 545 van den Bogaard, A. E., N. Bruinsma, and E. E. Stobberingh. 2000. The effect of banning  
546 avoparcin on VRE carriage in The Netherlands. *Journal of Antimicrobial Chemotherapy* 46:146–  
547 148.
- 548 Warsi, O. M., and D. E. Dykhuizen. 2017. Evolutionary implications of Liebig's law of the

549 minimum  $\square$ : Selection under low concentrations of two nonsubstitutable nutrients. *Ecology and*  
550 *Evolution* 7:5296–5309.

551 Wistrand-Yuen, E., M. Knopp, K. Hjort, S. Koskiniemi, O. G. Berg, and D. I. Andersson. 2018.  
552 Evolution of high-level resistance during low-level antibiotic exposure. *Nature Communications*  
553 9:1–12.

554 Zojer, M., L. N. Schuster, F. Schulz, A. Pfundner, M. Horn, and T. Rattei. 2017. Variant profiling  
555 of evolving prokaryotic populations. *PeerJ* 5:e2997.

556

557



558

|                                      | Strain Name | Description                                                                | Growth Condition | Streptomycin Concentration |
|--------------------------------------|-------------|----------------------------------------------------------------------------|------------------|----------------------------|
| Antibiotic Sensitive Ancestor        | DD1953      | wild type ancestor:<br>$2 \geq \text{MIC} \leq 4$                          |                  |                            |
| Antibiotic Resistant Ancestors       | FS1         | resistant ancestor strain ( <i>rpsL</i> : K42N)                            |                  |                            |
|                                      | FS5         | resistant ancestor strain ( <i>rpsL</i> : K42N) T5 bacteriophage resistant |                  |                            |
|                                      | 4C2-12R     | Experimentally evolved                                                     | Chemostat        | High                       |
|                                      | 4C3-10S     | Experimentally evolved                                                     | Chemostat        | Low                        |
| Evolved Antibiotic Resistant Strains | 4C4-10S     | Experimentally evolved                                                     | Chemostat        | No Streptomycin            |
|                                      | 4S1-44R     | Experimentally evolved                                                     | Serial Transfer  | High                       |
|                                      | 4S1-44S     | Experimentally evolved                                                     | Serial Transfer  | High                       |
|                                      | 4S2-44S     | Experimentally evolved                                                     | Serial Transfer  | High                       |

559

560 Table 1: Strain Names and Experimental Conditions

561 All strains were derived from a single antibiotic sensitive ancestor, DD1953. Two streptomycin  
 562 resistant mutants of DD1953 were generated, FS1 and FS5, differing only in resistance to T5  
 563 bacteriophage, which was used as a neutral molecular marker. Evolved strains experienced  
 564 different *in vitro* environments (4C designates chemostat evolved and 4S means evolved in  
 565 serial batch culture). Chemostat evolved strains also had a range of set streptomycin  
 566 concentrations for their time under experimental conditions (last column).

567

568

569

| Evolved Strain | Gene and Change                      | Frequency | Description                                                                                                   |
|----------------|--------------------------------------|-----------|---------------------------------------------------------------------------------------------------------------|
| 4C2-12R        | <i>galS</i> Deletion                 | 0.14      | 1,022 bp deletion                                                                                             |
|                | <i>galS</i> Deletion                 | 0.26      | 1 bp deletion                                                                                                 |
|                | <i>malT</i>                          | 0.41      | Nonsynonymous change                                                                                          |
|                | <i>malK</i>                          | 0.43      | Nonsynonymous change, ATP-binding subunit                                                                     |
| 4C3-10S        | <i>galS</i>                          | 1         | Nonsynonymous change                                                                                          |
| 4C4-10S        | <i>galS</i>                          | 1         | Synonymous change                                                                                             |
| 4S1-44R        | <i>rpsD</i>                          | 0.27      | Structural constituent of ribosome; nonsynonymous change, L198P. Previously unreported compensatory mutation. |
|                | <i>rpsD</i>                          | 0.2       | Structural constituent of ribosome; nonsynonymous change, I199S. Previously unreported compensatory mutation. |
|                | <i>rpsE</i>                          | 0.5       | Structural constituent of ribosome; nonsynonymous change, G108V. Known compensatory mutation site.            |
|                | <i>acs</i>                           | 0.6       | Acetyl CoA synthase, acetate-scavenging enzyme, improves carbon starvation survival; promoter region          |
| 4S1-44S        | <i>rpsE</i>                          | 1         | Structural constituent of ribosome; nonsynonymous change, G108A. Known compensatory mutation site.            |
|                | <i>yjcO</i> intergenic region        | 0.27      | Sel1 family TPR-like repeat protein; function unknown                                                         |
| 4S2-44S        | <i>gstB</i> promoter region          | 1         | glutathione-dependent bromoacetate dehalogenase                                                               |
|                | <i>rpsE</i>                          | 1         | Structural constituent of ribosome; nonsynonymous change, G86C. Known compensatory mutation.                  |
|                | <i>yjcO</i> intergenic region        | 0.26      | Sel1 family TPR-like repeat protein; function unknown                                                         |
|                | <i>yjeJ</i> proximal promoter region | 1         | Uncharacterized protein                                                                                       |

570

571 Table 2: Genetic Changes in Evolved Strains Relative to Antibiotic Resistant Ancestor

572 Genetic changes identified through MiSeq relative to the relevant antibiotic resistant ancestor  
 573 (FS1 or FS5). SNP frequency, as quantified through the VarCap bioinformatics pipeline, as well  
 574 as function data (as per the Ecogene database, <http://ecogene.org>) are provided for each  
 575 mutated gene.

576

577

| <b>Pre-Experiment</b> |                | <b>Post-Experiment</b> |                |
|-----------------------|----------------|------------------------|----------------|
| <b>Strain</b>         | <b>Fitness</b> | <b>Strain</b>          | <b>Fitness</b> |
| DD1953                | 1              | FS1                    | 1              |
| FS1                   | 0.919          | FS5                    | 0.998          |
| FS5                   | 0.917          | 4C2-12R                | 1.04           |
|                       |                | 4C3-10S                | 1.03           |
|                       |                | 4C4-10S                | 1.03           |
|                       |                | 4S1-44S                | 1.02           |
|                       |                | 4S1-44R                | 1.02           |
|                       |                | 4S2-44S                | ND             |

578

579 Table 3: Strain Relative Fitnesses before and After Evolution Experiment

580 All relative fitnesses were quantified from direct competition in chemostats. Fitness was  
581 measured as the slope of the best fit line for a time series of ratios of T5 sensitive to T5 resistant  
582 colonies (in manner of Dykhuizen and Hartl, 1980). A. Fitnesses of streptomycin resistant  
583 ancestors (FS1, FS5) relative to their streptomycin sensitive ancestor, DD1953. B. Relative  
584 fitnesses of all evolved strains relative to their pre-experiment ancestor, as obtained by direct  
585 competition. ND indicates not determined.

586

587

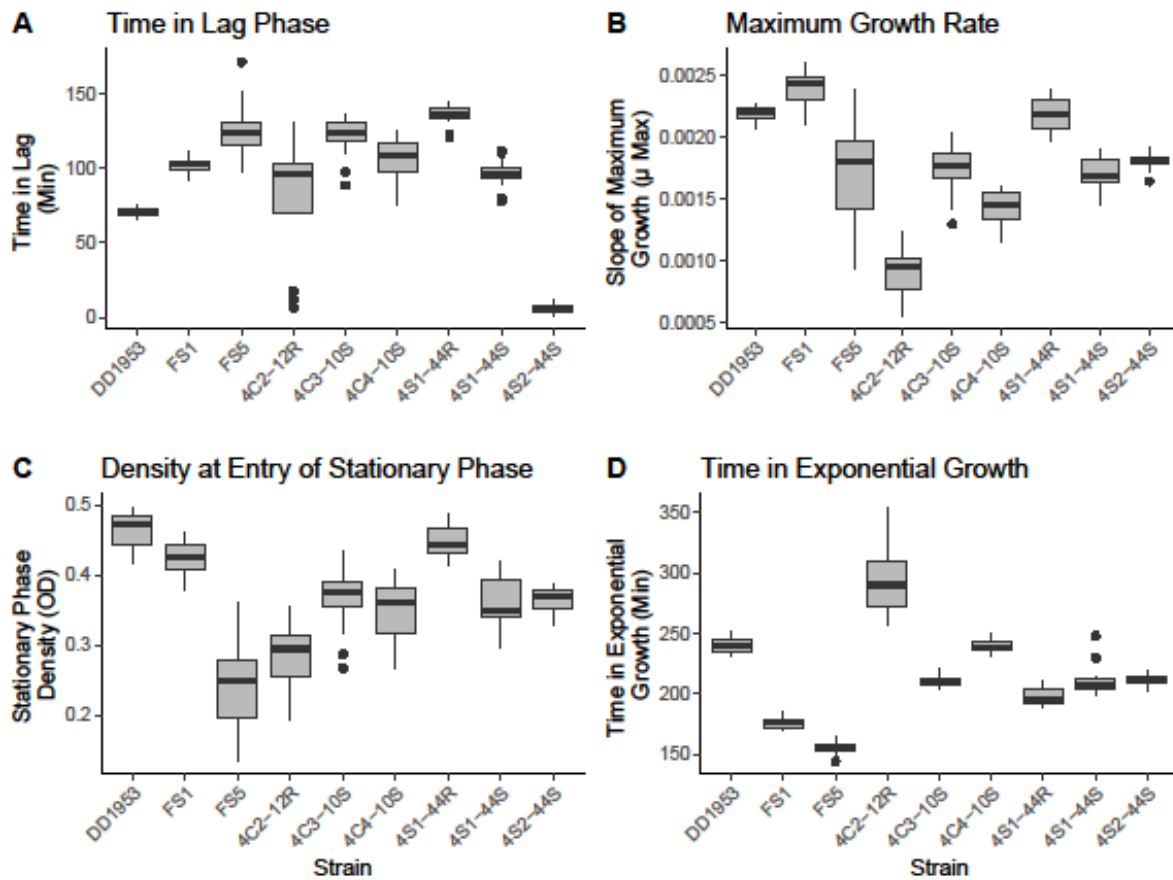

588

589 Figure 1: Boxplots of Growth Curve Assay for Ancestor and Evolved Strains

590 All strains were tracked in a 96-well plate assay for growth related phenotypes. A. Time Spent  
591 in Lag Phase: No observable pattern for changes in time spent in lag phase was found for  
592 strains. B. Maximum Growth Rate: Counter to expectation, maximal growth rate did not decline  
593 for streptomycin resistant strains FS1 or FS5 relative to DD1953 and then did not increase after  
594 evolution under serial passage conditions. In fact,  $\mu_{max}$  declined in flask evolved strains relative  
595 to the antibiotic resistant ancestors. C. Population Density at Entry to Stationary Phase: The  
596 final density of experimental populations did not show a pattern after experimental evolution. D.  
597 Time Spent in Exponential Phase: The time spent in exponential growth significantly declined  
598 for streptomycin resistant mutants FS1 and FS5 relative to the DD1953 Ancestor. Following *in*  
599 *vitro* evolution, all evolved strains showed significant increases in the time spent in exponential  
600 growth, with values approaching those of DD1953. This phenotype has not been previously  
601 described relating to antibiotic resistance.

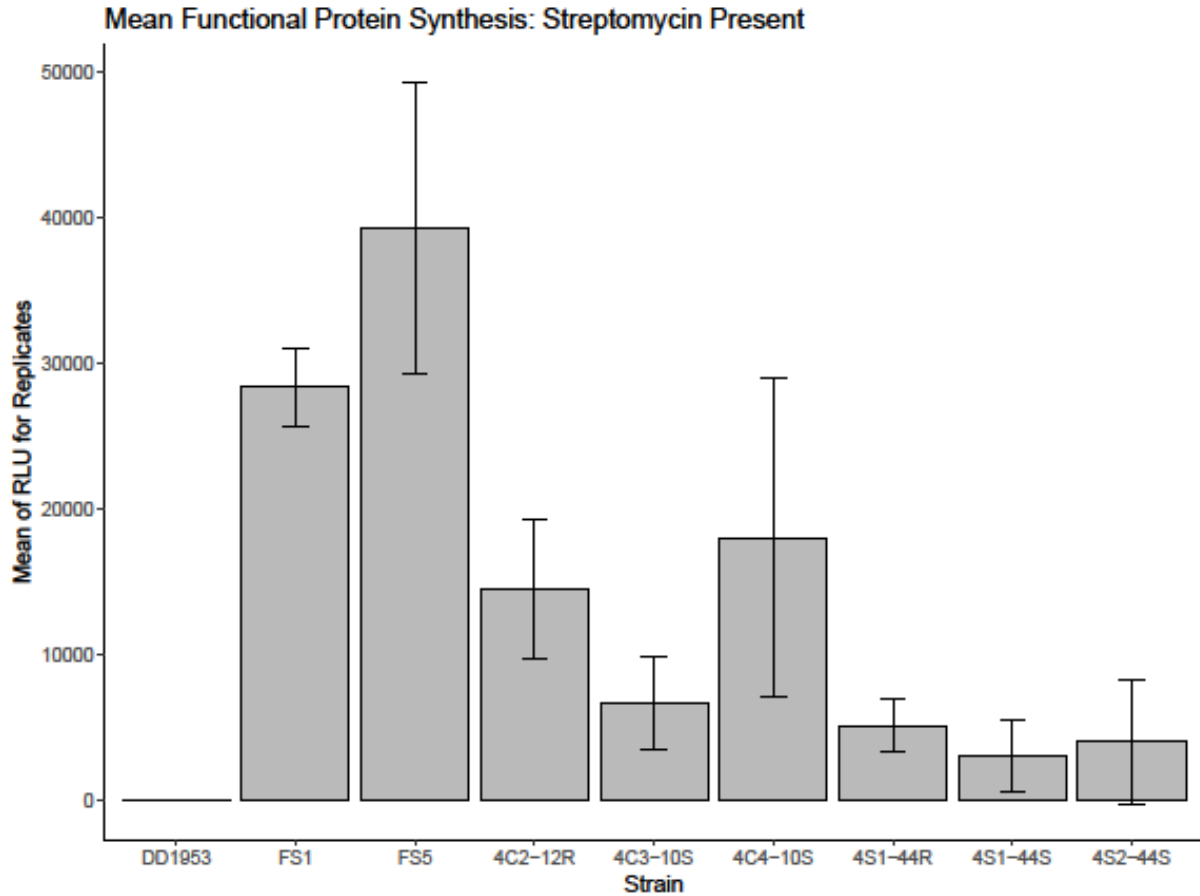

602

603 Figure 3: Mean Functional Protein Synthesis with Streptomycin Present

604 A functional protein synthesis assay was developed that quantified the amount of functional  
605 firefly luciferase protein produced in one hour. Quantities taken using Relative Light Units in a  
606 luminometer. Contrary to expectation, evolved strains had lower rates of function protein  
607 production than streptomycin resistant ancestors, FS1 or FS5. The evolved strain with the  
608 highest mean functional protein production (and largest confidence interval) is 4C4-10S, which  
609 evolved *without* streptomycin present in the chemostat. Error bars indicate 95% CI. See  
610 Supplemental Information for assay conditions and protocol.
